# Supplementary material for: Osteogenic differentiation of human mesenchymal stem cells on α5 integrin binding peptide hydrogels is dependent on substrate elasticity
Source: Royal Society of Chemistry journal article supplement (doi:10.1039/c3bm60149h), 2013-11-19
Supplement: c3bm60149h.pdf [file c3bm60149h.pdf]

## Supplementary Information:

### Osteogenic differentiation of human mesenchymal stem cells via $\alpha 5$ integrin signalling is dependent on substrate elasticity

Navakanth R. Gandavarapu,<sup>a</sup> Daniel L. Alge,<sup>b</sup> and Kristi S. Anseth<sup>\*a,b</sup>

**Table S1.** Primer sequences used for RT-PCR

| Primer  | Nucleotide Sequence (5'-3') |
|---------|-----------------------------|
| COLL-1a | GGGCAAGACAGTGATTGAATACA     |
|         | GGATGGAGGGAGTTTACAGGAA      |
| CBFA1   | GGTATGTCCGCCACCACTC         |
|         | TGACGAAGTGCCATAGTAGAGATA    |
| GAPDH   | GCAAGAGCACAAGAGGAAGAG       |
|         | AAGGGGTCTACATGGCAACT        |
| OPN     | ATTCTGGGAGGGCTTGGTTG        |
|         | TCTGGTCCCGACGATGCT          |

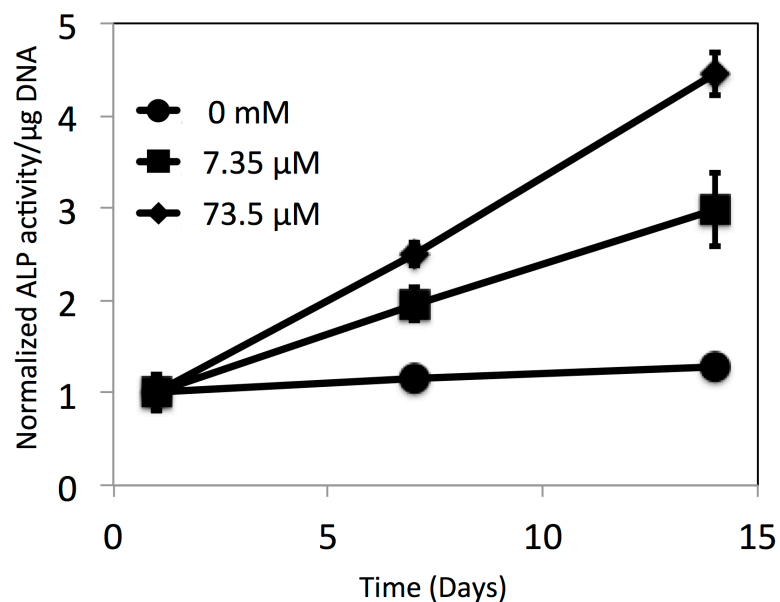

**Figure S1. Soluble delivery of c(RRETAWA) induces osteogenic differentiation in hMSCs.** Figure shows the alkaline phosphatase (ALP) activity of hMSCs at day 7 and 14 cultured on TCPS in growth media supplemented with 7.35 μM (■) or 73.5 μM (◆) c(RRETAWA) peptide. Normalized ALP activity of hMSCs cultured on TCPS in growth media (●) without the peptide is also included as negative control. Normalized ALP activity was calculated by normalizing the measured ALP activity to that of day 1.
